# Supplementary material
Source: PubMed Central journal article supplement (PMC5470419)
Supplement: jamaophthalmol-135-469-s001.pdf [file jamaophthalmol-135-469-s001.pdf]

## Supplementary Online Content

Fenwick EK, Man REK, Cheung CMG, et al. Ethnic differences in the association between age-related macular degeneration and vision-specific functioning.

*JAMA Ophthalmol.* Published online March 30, 2017.

doi:10.1001/jamaophthalmol.2017.0266

**eTable 1.** Association Between Age-Related Macular Degeneration (AMD) and Vision-Specific Functioning (VSF) in Multiple Linear Regression Models

**eTable 2.** Sociodemographic and Clinical Characteristics of Participants, Stratified by Age-Related Macular Degeneration

**eTable 3.** Association Between Severity of AMD and VSF by Ethnicity in Multiple Linear Regression Models Using Worse-Seeing Presenting Visual Acuity

This supplementary material has been provided by the authors to give readers additional information about their work.

| <b>eTable 1.</b> Association between age-related macular degeneration (AMD) and vision-specific functioning (VSF) in multiple linear regression models |                                    |                |              |                       |                  |
|--------------------------------------------------------------------------------------------------------------------------------------------------------|------------------------------------|----------------|--------------|-----------------------|------------------|
| <i>Categorical variables</i>                                                                                                                           | <i>VSF person measure (logits)</i> | <i>95 % CI</i> |              | <i>Percent Change</i> | <i>P value</i>   |
| Gender                                                                                                                                                 |                                    |                |              |                       |                  |
| Male (reference)                                                                                                                                       | 3.89 ± 0.02                        | 3.85           | 3.92         |                       |                  |
| Female                                                                                                                                                 | <b>-0.19 ± 0.03</b>                | <b>-0.25</b>   | <b>-0.13</b> | <b>4.86%</b>          | <b>&lt;0.001</b> |
| Ethnicity                                                                                                                                              |                                    |                |              |                       |                  |
| Chinese (reference)                                                                                                                                    | 4.01 ± 0.02                        | 3.98           | 4.05         |                       |                  |
| Malay                                                                                                                                                  | <b>-0.31 ± 0.03</b>                | <b>-0.36</b>   | <b>-0.25</b> | <b>7.60%</b>          | <b>&lt;0.001</b> |
| Indian                                                                                                                                                 | <b>-0.36 ± 0.03</b>                | <b>-0.42</b>   | <b>-0.31</b> | <b>9.02%</b>          | <b>&lt;0.001</b> |
| Income (\$SGD/month)                                                                                                                                   |                                    |                |              |                       |                  |
| <\$1000 (reference)                                                                                                                                    | 3.734 ± 0.017                      | 3.70           | 3.77         |                       |                  |
| \$1000 to <\$2000                                                                                                                                      | <b>0.15 ± 0.03</b>                 | <b>0.09</b>    | <b>0.21</b>  | <b>3.99%</b>          | <b>&lt;0.001</b> |
| ≥\$2000                                                                                                                                                | <b>0.10 ± 0.04</b>                 | <b>0.03</b>    | <b>0.17</b>  | <b>2.73%</b>          | <b>0.004</b>     |
| Education                                                                                                                                              |                                    |                |              |                       |                  |
| Primary or lower (reference)                                                                                                                           | 3.72 ± 0.02                        | 3.69           | 3.75         |                       |                  |
| Secondary                                                                                                                                              | <b>0.22 ± 0.03</b>                 | <b>0.16</b>    | <b>0.27</b>  | <b>5.81%</b>          | <b>&lt;0.001</b> |
| Post-secondary                                                                                                                                         | <b>0.16 ± 0.04</b>                 | <b>0.08</b>    | <b>0.23</b>  | <b>4.20%</b>          | <b>&lt;0.001</b> |
| Smoking status                                                                                                                                         |                                    |                |              |                       |                  |
| Never (Reference)                                                                                                                                      | 3.82 ± 0.01                        | 3.79           | 3.85         |                       |                  |
| Current                                                                                                                                                | <b>-0.13 ± 0.04</b>                | <b>-0.21</b>   | <b>-0.06</b> | <b>3.51%</b>          | <b>&lt;0.001</b> |
| Past                                                                                                                                                   | -0.06 ± 0.04                       | -0.13          | 0.02         | 1.49%                 | 0.124            |
| Other eye condition§ (yes)                                                                                                                             | <b>-0.04 ± 0.04</b>                | -0.09          | 0.02         |                       | 0.197            |
| Hypertension (yes)                                                                                                                                     | 0.03 ± 0.03                        | -0.03          | 0.07         |                       | 0.328            |
| Diabetes (yes)                                                                                                                                         | <b>-0.07 ± 0.03</b>                | <b>-0.13</b>   | <b>-0.02</b> |                       | <b>0.009</b>     |
| Cardiovascular disease* (yes)                                                                                                                          | <b>-0.25 ± 0.04</b>                | <b>-0.32</b>   | <b>-0.17</b> |                       | <b>&lt;0.001</b> |
| Total cholesterol (mmol/l)                                                                                                                             | -0.02 ± 0.01                       | -0.04          | -0.00        |                       | <b>0.032</b>     |
| AMD severity                                                                                                                                           |                                    |                |              |                       |                  |
| No AMD (reference)                                                                                                                                     | 3.80 ± 0.01                        | 3.77           | 3.82         |                       |                  |
| Early AMD                                                                                                                                              | -0.04 ± 0.05                       | -0.13          | 0.06         | 0.97%                 | 0.441            |
| Late AMD                                                                                                                                               | <b>-0.41 ± 0.14</b>                | <b>-0.69</b>   | <b>-0.13</b> | <b>10.7%</b>          | <b>0.004</b>     |
| <i>Continuous variables</i>                                                                                                                            |                                    |                |              |                       |                  |
| Presenting visual acuity (better eye, logMAR)                                                                                                          | <b>-1.55 ± 0.06</b>                | <b>-1.67</b>   | <b>-1.42</b> |                       | <b>&lt;0.001</b> |
| Age, per 1 year increase                                                                                                                               | 0.00 ± 0.00                        | -0.00          | 0.00         |                       | 0.381            |
| *Includes heart attack, angina, stroke                                                                                                                 |                                    |                |              |                       |                  |
| § Includes glaucoma, diabetic retinopathy, cataract                                                                                                    |                                    |                |              |                       |                  |

| <b>eTable 2.</b> Sociodemographic and clinical characteristics of participants, stratified by age-related macular degeneration |                                    |                         |                           |                         |                  |
|--------------------------------------------------------------------------------------------------------------------------------|------------------------------------|-------------------------|---------------------------|-------------------------|------------------|
| <i>Categorical variables<sup>a</sup></i>                                                                                       | <i>All participants (n= 9,962)</i> | <i>No AMD (n= 9312)</i> | <i>Early AMD (n= 590)</i> | <i>Late AMD (n= 60)</i> | <i>P Value</i>   |
| Gender                                                                                                                         |                                    |                         |                           |                         |                  |
| Male                                                                                                                           | 4909 (49.3)                        | 4525 (48.6)             | 345 (58.5)                | 39 (65.0)               | <b>&lt;0.001</b> |
| Age (years)                                                                                                                    |                                    |                         |                           |                         |                  |
| 40-49                                                                                                                          | 2464 (24.7)                        | 2406 (25.8)             | 57 (9.66)                 | 1 (1.67)                | <b>&lt;0.001</b> |
| 50-59                                                                                                                          | 3133 (31.5)                        | 3023 (32.5)             | 102 (17.3)                | 8 (13.3)                |                  |
| 60-69                                                                                                                          | 2543 (25.5)                        | 2335 (25.1)             | 199 (33.7)                | 9 (15.0)                |                  |
| 70-80                                                                                                                          | 1822 (18.3)                        | 1548 (16.6)             | 232 (39.3)                | 42 (70.0)               |                  |
| Ethnicity                                                                                                                      |                                    |                         |                           |                         |                  |
| Chinese                                                                                                                        | 3338 (33.5)                        | 3072 (33.0)             | 241 (40.9)                | 25 (41.7)               | <b>0.001</b>     |
| Malays                                                                                                                         | 3253 (32.7)                        | 3071 (33.0)             | 161 (27.3)                | 21 (35.0)               |                  |
| Indians                                                                                                                        | 3371 (33.8)                        | 3169 (34.0)             | 188 (31.9)                | 14 (23.3)               |                  |
| Education                                                                                                                      |                                    |                         |                           |                         |                  |
| Primary or lower                                                                                                               | 6017 (60.5)                        | 5533 (59.5)             | 432 (73.6)                | 52 (86.7)               | <b>&lt;0.001</b> |
| Secondary                                                                                                                      | 2333 (23.5)                        | 2239 (24.1)             | 89 (15.2)                 | 5 (8.33)                |                  |
| Post-secondary                                                                                                                 | 1595 (16.0)                        | 1526 (16.4)             | 66 (11.2)                 | 3 (5.00)                |                  |
| Income (\$SGD/month)                                                                                                           |                                    |                         |                           |                         |                  |
| <\$1000                                                                                                                        | 5383 (55.2)                        | 4939 (54.1)             | 393 (68.5)                | 51 (86.4)               | <b>&lt;0.001</b> |
| \$1000 to <\$2000                                                                                                              | 2197 (22.5)                        | 2092 (22.9)             | 101 (17.6)                | 4 (6.78)                |                  |
| ≥\$2000                                                                                                                        | 2180 (22.3)                        | 2096 (23.0)             | 80 (13.9)                 | 4 (6.78)                |                  |
| Smoking status                                                                                                                 |                                    |                         |                           |                         |                  |
| Never                                                                                                                          | 6923 (69.6)                        | 6498 (69.8)             | 393 (66.7)                | 32 (53.3)               | <b>&lt;0.001</b> |
| Current                                                                                                                        | 1593 (16.0)                        | 1507 (16.2)             | 73 (12.4)                 | 13 (21.7)               |                  |
| Past                                                                                                                           | 1437 (14.4)                        | 1299 (14.0)             | 123 (20.9)                | 15 (25.0)               |                  |
| Hypertension (yes)                                                                                                             | 6119 (61.9)                        | 5615 (60.5)             | 451 (76.4)                | 53 (88.3)               | <b>&lt;0.001</b> |
| Cardiovascular disease <sup>b</sup> (yes)                                                                                      | 1074 (10.8)                        | 973 (10.5)              | 96 (16.4)                 | 5 (8.47)                | <b>&lt;0.001</b> |
| Diabetes                                                                                                                       |                                    |                         |                           |                         |                  |
| Non-diabetics                                                                                                                  | 7191 (75.2)                        | 6738 (75.4)             | 418 (73.5)                | 35 (59.3)               | <b>0.005</b>     |
| Diabetics without retinopathy                                                                                                  | 1550 (16.2)                        | 1422 (15.9)             | 112 (19.7)                | 16 (27.1)               |                  |

|                                                                                                                                                                                                                                                                                                                                                                                                                                                          |              |              |              |              |                  |
|----------------------------------------------------------------------------------------------------------------------------------------------------------------------------------------------------------------------------------------------------------------------------------------------------------------------------------------------------------------------------------------------------------------------------------------------------------|--------------|--------------|--------------|--------------|------------------|
| Diabetics with retinopathy                                                                                                                                                                                                                                                                                                                                                                                                                               | 818 (8.56)   | 771 (8.63)   | 39 (6.85)    | 8 (13.6)     |                  |
| Cataract (yes)                                                                                                                                                                                                                                                                                                                                                                                                                                           | 4229 (44.0)  | 3798 (42.3)  | 381 (66.3)   | 50 (83.3)    | <b>&lt;0.001</b> |
| Glaucoma (yes)                                                                                                                                                                                                                                                                                                                                                                                                                                           | 359 (3.60)   | 322 (3.46)   | 33 (5.59)    | 4 (6.67)     | <b>0.011</b>     |
| <i>Continuous variables<sup>a</sup></i>                                                                                                                                                                                                                                                                                                                                                                                                                  |              |              |              |              |                  |
| Systolic BP (mmHg)                                                                                                                                                                                                                                                                                                                                                                                                                                       | 139.9 (21.9) | 139.5 (21.8) | 145.3 (21.8) | 149.5 (23.0) | <b>&lt;0.001</b> |
| Presenting VA - better eye (logMAR)                                                                                                                                                                                                                                                                                                                                                                                                                      | 0.20 (0.23)  | 0.20 (0.23)  | 0.25 (0.21)  | 0.51 (0.44)  | <b>&lt;0.001</b> |
| Presenting VA - worse eye (logMAR)                                                                                                                                                                                                                                                                                                                                                                                                                       | 0.39 (0.46)  | 0.38 (0.46)  | 0.46 (0.44)  | 1.22 (0.68)  | <b>&lt;0.001</b> |
| Total cholesterol (mmol/l)                                                                                                                                                                                                                                                                                                                                                                                                                               | 5.42 (1.13)  | 5.43 (1.13)  | 5.22 (1.14)  | 5.31 (1.12)  | <b>&lt;0.001</b> |
| Vision-specific functioning score (logits)                                                                                                                                                                                                                                                                                                                                                                                                               | 3.80 (1.17)  | 3.69 (1.24)  | 3.69 (1.24)  | 2.92 (1.86)  | <b>&lt;0.001</b> |
| <sup>a</sup> Values are n (%) for categorical variables and mean (SD) for continuous variables<br><sup>b</sup> Includes heart attack, angina, stroke<br>AMD=age-related macular degeneration; BP=Blood pressure; SGD=Singapore dollars; VA= visual acuity<br>There were no significant differences for diastolic BP, body mass index, HbA1c, high density lipoprotein cholesterol and triglycerides.<br>Bolded values indicate statistical significance. |              |              |              |              |                  |

| <b>eTable 3.</b> Association between severity of AMD and VSF by ethnicity in multiple linear regression models using worse-seeing presenting visual acuity <sup>a</sup>                                                                                            |                                    |                 |                                |
|--------------------------------------------------------------------------------------------------------------------------------------------------------------------------------------------------------------------------------------------------------------------|------------------------------------|-----------------|--------------------------------|
| <i>AMD category</i>                                                                                                                                                                                                                                                | <i>Vision-specific functioning</i> | <i>P-value</i>  | <i>% change from reference</i> |
| <u>CHINESE</u>                                                                                                                                                                                                                                                     |                                    |                 |                                |
| None (ref)                                                                                                                                                                                                                                                         | 4.08±0.02                          | P-trend <0.001  |                                |
| Early AMD                                                                                                                                                                                                                                                          | -0.11 (-0.22, -0.01)               | 0.074           | 2.70%                          |
| Late AMD                                                                                                                                                                                                                                                           | <b><u>-0.57 (-0.93, -0.22)</u></b> | <b>0.002</b>    | <b>14.0%</b>                   |
| <u>MALAY</u>                                                                                                                                                                                                                                                       |                                    |                 |                                |
| None (ref)                                                                                                                                                                                                                                                         | 3.63±0.02                          | P-trend = 0.001 |                                |
| Early AMD                                                                                                                                                                                                                                                          | -0.04 (-0.24, 0.16)                | 0.695           | 1.10%                          |
| Late AMD                                                                                                                                                                                                                                                           | <b><u>-0.55 (-1.08, -0.03)</u></b> | <b>0.040</b>    | <b>15.2%</b>                   |
| <u>INDIAN</u>                                                                                                                                                                                                                                                      |                                    |                 |                                |
| None (ref)                                                                                                                                                                                                                                                         | 3.69±0.02                          | P-trend = 0.116 |                                |
| Early AMD                                                                                                                                                                                                                                                          | 0.00 (-0.18, 0.18)                 | 0.992           | 0.02%                          |
| Late AMD                                                                                                                                                                                                                                                           | 0.49 (-0.12, 1.09)                 | 0.114           | 13.3%                          |
| AMD=age-related macular degeneration.                                                                                                                                                                                                                              |                                    |                 |                                |
| <sup>a</sup> Adjusted for age, gender, presenting visual acuity (worse-seeing eye), education, income, smoking status, hypertension, diabetes, diabetic retinopathy, cataract, glaucoma, cardiovascular disease (heart attack, angina, stroke), total cholesterol. |                                    |                 |                                |
| <b>Bolded</b> values indicates significant associations (p<0.05); <b>Bolded</b> and <u>underlined</u> values indicate significant and clinically meaningful associations.                                                                                          |                                    |                 |                                |
